# Supplementary material for: Ambient aerosol properties in the remote atmosphere from global-scale in-situmeasurements
Source: Copernicus journal article supplement (doi:10.5194/acp-2021-173), 2021-03-04
Supplement: Supplementary file 1 [file acp-2021-173-supplement.pdf]

# Ambient aerosol properties in the remote atmosphere from global-scale in-situ measurements

## Supplemental Materials

### Four-mode lognormal fits to measured size distributions

5            Lognormal functions (Eq. 1) provide a concise description of the aerosol size distribution. Objectively fitting lognormal curves to multiple, dynamically varying modes spanning the diameter range from 3 nm to 50  $\mu\text{m}$  is quite challenging. We have developed the following approach, which results in four lognormal functions that summed together accurately represent the number, surface, and volume of the entire size distribution. The coarse mode is first fitted using the portion of the volume size distribution with diameters from 1-6  $\mu\text{m}$ , to avoid fitting noise from larger particles with poor  
10 counting statistics. The fitted mode diameter  $D_{g,v}$  is constrained to lie between 1 and 10  $\mu\text{m}$ , and the geometric standard deviation  $\sigma_g$  is constrained between 1.5 and 4. If the least-squares fit to Eq. 1 successfully converges, the volume median diameter is converted to number median diameter using the Hatch-Choate relationships (Heintzenberg, 1994) and the integrated volume converted to integrated number. This fitted size coarse-mode lognormal function is then subtracted from the original size distribution. Negative residual values are set to zero. The volume-weighted residual size distribution is then  
15 converted to volume space, and a lognormal fit is made to particles with diameters from 0.08-1  $\mu\text{m}$ , with constraints of  $D_{g,v}$  from 0.1-1.2  $\mu\text{m}$  and of  $\sigma_g$  from 1.2-2.5. As before, the fitted distribution is converted to number space and subtracted from the residual size distribution. The Aitken and nucleation modes are subsequently each fitted directly to the residual number size distribution with constraints of  $D_{g,n}$  from 0.01-0.2  $\mu\text{m}$  and of  $\sigma_g$  from 1.2-2.5 over the size range from 0.008-0.2  $\mu\text{m}$  for the Aitken mode, and constraints of  $D_{g,n}$  from 0.002-0.01  $\mu\text{m}$  and of  $\sigma_g$  from 1.2-2.5 over the size range from 0.003 to 0.012  
20  $\mu\text{m}$  for the nucleation mode.

A reconstructed size distribution is created by summing the four lognormal functions from the four modes. The validity of the fits is checked by integrating the number, surface, and volume of this reconstructed size distribution and

comparing it to the measured size distribution over different size ranges. Least-squares regressions of these integrated values from the lognormal fits and the measured size distributions are provided in Tables S2-4. Slopes lie between 0.94 and 1.07

25 with  $r^2$  values  $>0.76$ .

Table S1. Latitude boundaries for the regional air mass definitions for each ATom deployment.

| Deployment | Arctic/midlatitude | North<br>midlatitude/tropics | South<br>midlatitude/tropics | Antarctic/midlatitude |
|------------|--------------------|------------------------------|------------------------------|-----------------------|
| ATom-1     | 60 °N              | 34 °N                        | 21 °S                        | 60 °S                 |
| ATom-2     | 60 °N              | 27 °N                        | 32 °S                        | 60 °S                 |
| ATom-3     | 61°N               | 29 °N                        | 25 °S                        | 60 °S                 |
| ATom-4     | 59 °N              | 20 °N                        | 23 °S                        | 60 °S                 |

30 Table S2. Parameters from linear regression between integrated number concentration calculated from size distributions from four-mode lognormal fits to the measurements (ordinate) and integrated number directly from measurements (abscissa). Regression coefficients are from orthogonal distance (two-sided) regression; Pearson's regression coefficient ( $r^2$ ) is from a one-sided fit. N is the number of 60s data points in the comparison.

| Mode         | Y-Intercept       | Slope             | $r^2$ | N     |
|--------------|-------------------|-------------------|-------|-------|
| Nucleation   | $-136 \pm 5$      | $0.979 \pm 0.001$ | 0.974 | 18742 |
| Aitken       | $-93 \pm 5$       | $0.996 \pm 0.003$ | 0.761 | 18761 |
| Accumulation | $-9.9 \pm 0.7$    | $1.072 \pm 0.002$ | 0.939 | 18689 |
| Coarse       | $0.036 \pm 0.008$ | $0.958 \pm 0.002$ | 0.905 | 18665 |

Table S3. As in Table S2, but for surface area.

| Mode         | Y-Intercept        | Slope             | $r^2$ | N     |
|--------------|--------------------|-------------------|-------|-------|
| Nucleation   | $-0.023 \pm 0.001$ | $0.977 \pm 0.002$ | 0.907 | 18742 |
| Aitken       | $-0.29 \pm .01$    | $0.990 \pm 0.002$ | 0.903 | 18761 |
| Accumulation | $-0.20 \pm 0.04$   | $1.037 \pm 0.002$ | 0.953 | 18689 |
| Coarse       | $0.04 \pm 0.09$    | $0.991 \pm 0.004$ | 0.783 | 18665 |

35

Table S4. As in Table S2, but for volume.

| Mode         | Y-Intercept         | Slope             | $r^2$ | N     |
|--------------|---------------------|-------------------|-------|-------|
| Nucleation   | $1.8e-5 \pm 2E-6$   | $0.943 \pm 0.003$ | 0.836 | 18742 |
| Aitken       | $-0.002 \pm 0.0001$ | $0.988 \pm 0.002$ | 0.920 | 18761 |
| Accumulation | $-0.0054 \pm 0.002$ | $1.030 \pm 0.002$ | 0.945 | 18689 |
| Coarse       | $0.12 \pm 0.03$     | $1.022 \pm 0.003$ | 0.872 | 18665 |



40 Table S5. BC mass mixing ratio (MMR; ng g<sup>-1</sup><sub>air</sub>), number geometric mean diameter ( $D_g$ , nm) for BC core assuming mass-equivalent sphere, geometric standard deviation ( $\sigma_g$ , thickness of non-absorbing coating (CT, nm) and calculated mass absorption cross section (MAC, m<sup>2</sup>g<sup>-1</sup>) at 532 nm for the different regions and air mass types. Data from the northern and southern hemisphere stratosphere have been combined.

| Free Troposphere             |       |                 |                  |                 | ATom-1 |       |                 |                  |                 | ATom-2 |      |                 |                  |                 | ATom-3 |      |                 |                  |                 | ATom-4 |  |  |  |  |
|------------------------------|-------|-----------------|------------------|-----------------|--------|-------|-----------------|------------------|-----------------|--------|------|-----------------|------------------|-----------------|--------|------|-----------------|------------------|-----------------|--------|--|--|--|--|
| Pacific                      | MMR   | $D_g$           | $\sigma_g$       | CT              | MAC    | MMR   | $D_g$           | $\sigma_g$       | CT              | MAC    | MMR  | $D_g$           | $\sigma_g$       | CT              | MAC    | MMR  | $D_g$           | $\sigma_g$       | CT              | MAC    |  |  |  |  |
| Antarctic/S.Ocean            | 1.7   | 108             | 1.5              | 78              | 14.6   | 0.6   | 96              | 1.52             | 102             | 17.2   | 8.3  | 110             | 1.5              | 76              | 14.3   | 0.3  | 84              | 1.57             | 60              | 14.4   |  |  |  |  |
| S. Midlatitudes              | 2     | 105             | 1.51             | 75              | 14.5   | 1.3   | 73              | 1.66             | 76              | 15.9   | 12.1 | 107             | 1.51             | 70              | 13.9   | 2    | 79              | 1.65             | 54              | 13.3   |  |  |  |  |
| Tropics                      | 2     | 91              | 1.58             | 58              | 13.3   | 2.6   | 94              | 1.6              | 81              | 14.6   | 4    | 96              | 1.53             | 61              | 13.9   | 0.9  | 76              | 1.63             | 64              | 14.8   |  |  |  |  |
| N. Midlatitudes              | 9.9   | 83              | 1.62             | 72              | 14.9   | 9.3   | 97              | 1.63             | 102             | 14.9   | 9.3  | 84              | 1.65             | 71              | 14.2   | 18.8 | 84              | 1.6              | 65              | 14.4   |  |  |  |  |
| Arctic                       | 4.4   | 58              | 1.72             | 60              | 15.5   | 7.1   | 85              | 1.73             | 84              | 14.1   | 7.4  | 81              | 1.64             | 114             | 17.3   | 10.4 | 92              | 1.58             | 72              | 14.5   |  |  |  |  |
| <b>Atlantic</b>              |       |                 |                  |                 |        |       |                 |                  |                 |        |      |                 |                  |                 |        |      |                 |                  |                 |        |  |  |  |  |
| Antarctic/S.Ocean            | -     | -               | -                | -               | -      | -     | -               | -                | -               | -      | 2.4  | 115             | 1.49             | 77              | 14.0   | 0.3  | 87              | 1.63             | 66              | 13.7   |  |  |  |  |
| S. Midlatitudes              | 3.5   | 106             | 1.52             | 67              | 13.6   | 0.2   | 102             | 1.52             | 85              | 15.4   | 7.9  | 98              | 1.58             | 61              | 12.9   | 0.9  | 93              | 1.54             | 51              | 13.1   |  |  |  |  |
| Tropics                      | 28.2  | 134             | 1.44             | 84              | 13.6   | 12.5  | 123             | 1.49             | 67              | 12.4   | 19.5 | 95              | 1.56             | 47              | 12.2   | 2.9  | 105             | 1.51             | 44              | 11.8   |  |  |  |  |
| N. Midlatitudes              | 2.9   | 51              | 1.8              | 59              | 15.7   | 3.1   | 77              | 1.7              | 71              | 14.5   | 4.9  | 66              | 1.75             | 64              | 14.7   | 12.4 | 95              | 1.56             | 71              | 14.4   |  |  |  |  |
| Arctic                       | 2.7   | 63              | 1.74             | 83              | 16.9   | 4.3   | 75              | 1.7              | 73              | 14.9   | 7.7  | 62              | 1.82             | 75              | 15.8   | 11.8 | 98              | 1.53             | 76              | 15.0   |  |  |  |  |
| <b>Marine Boundary Layer</b> |       |                 |                  |                 |        |       |                 |                  |                 |        |      |                 |                  |                 |        |      |                 |                  |                 |        |  |  |  |  |
| Pacific                      | MMR   | $D_g$           | $\sigma_g$       | CT              | MAC    | MMR   | $D_g$           | $\sigma_g$       | CT              | MAC    | MMR  | $D_g$           | $\sigma_g$       | CT              | MAC    | MMR  | $D_g$           | $\sigma_g$       | CT              | MAC    |  |  |  |  |
| Antarctic/S.Ocean            | 0.1   | 93 <sup>A</sup> | 1.6 <sup>A</sup> | 60 <sup>A</sup> | 13.0   | 0.1   | 93 <sup>A</sup> | 1.6 <sup>A</sup> | 60 <sup>A</sup> | 13.0   | 0.2  | 93 <sup>A</sup> | 1.6 <sup>A</sup> | 60 <sup>A</sup> | 13.0   | 0    | 93 <sup>A</sup> | 1.6 <sup>A</sup> | 60 <sup>A</sup> | 13.0   |  |  |  |  |
| S. Midlatitudes              | 0.3   | 96              | 1.57             | 62              | 13.4   | 2.5   | 44              | 1.87             | 53              | 15.6   | 7.1  | 108             | 1.52             | 67              | 13.4   | 21.9 | 94              | 1.54             | 74              | 15.1   |  |  |  |  |
| Tropics                      | 13.1  | 98              | 1.53             | 58              | 13.4   | 3.5   | 106             | 1.54             | 84              | 14.6   | 9.6  | 112             | 1.48             | 65              | 13.6   | 17.6 | 98              | 1.54             | 61              | 13.5   |  |  |  |  |
| N. Midlatitudes              | 1     | 93 <sup>A</sup> | 1.6 <sup>A</sup> | 60 <sup>A</sup> | 13.0   | 5.9   | 104             | 1.62             | 119             | 14.6   | 2.7  | 84              | 1.67             | 77              | 14.4   | 18.8 | 97              | 1.55             | 73              | 14.5   |  |  |  |  |
| Arctic                       | 0.5   | 93 <sup>A</sup> | 1.6 <sup>A</sup> | 60 <sup>A</sup> | 13.0   | 48.6  | 132             | 1.62             | 91              | 10.9   | 0.7  | 93 <sup>A</sup> | 1.6 <sup>A</sup> | 60 <sup>A</sup> | 13.0   | 6.7  | 95              | 1.6              | 60              | 12.7   |  |  |  |  |
| <b>Atlantic</b>              |       |                 |                  |                 |        |       |                 |                  |                 |        |      |                 |                  |                 |        |      |                 |                  |                 |        |  |  |  |  |
| Antarctic/S.Ocean            | -     | -               | -                | -               | -      | -     | -               | -                | -               | -      | 1.2  | 119             | 1.48             | 74              | 13.6   |      | 93 <sup>A</sup> | 1.6 <sup>A</sup> | 60 <sup>A</sup> | 13.0   |  |  |  |  |
| S. Midlatitudes              | 42.7  | 122             | 1.47             | 57              | 12.1   | 0.3   | 93              | 1.6              | 52              | 12.3   | 20.7 | 90              | 1.61             | 44              | 11.7   | 0.5  | 93              | 1.6              | 57              | 12.7   |  |  |  |  |
| Tropics                      | 581.2 | 135             | 1.44             | 77              | 13.0   | 77.4  | 126             | 1.47             | 65              | 12.4   | 91.9 | 91              | 1.61             | 48              | 12.0   | 25   | 101             | 1.52             | 44              | 12.0   |  |  |  |  |
| N. Midlatitudes              | 10.8  | 61              | 1.76             | 57              | 14.6   | 3     | 85              | 1.68             | 75              | 14.0   | 4.9  | 77              | 1.69             | 78              | 15.2   | 7.9  | 91              | 1.57             | 60              | 13.7   |  |  |  |  |
| Arctic                       | 0.7   | 38              | 2.06             | 101             | 20.8   | 7.9   | 107             | 1.54             | 81              | 14.2   | 0.4  | 93 <sup>A</sup> | 1.6 <sup>A</sup> | 60 <sup>A</sup> | 13.0   | 3.3  | 106             | 1.5              | 71              | 14.3   |  |  |  |  |
| <b>Stratosphere</b>          |       |                 |                  |                 |        |       |                 |                  |                 |        |      |                 |                  |                 |        |      |                 |                  |                 |        |  |  |  |  |
| Stratosphere                 | 2     | 73              | 1.64             | 63              | 14.4   | 0.9   | 59              | 1.65             | 71              | 16.6   | 9.1  | 108             | 1.5              | 86              | 14.7   | 2.5  | 77              | 1.62             | 144             | 17.8   |  |  |  |  |
| Biomass Burning Plumes       | 164.7 | 129             | 1.46             | 85              | 13.3   | 71.2  | 138             | 1.41             | 75              | 12.7   | 31.3 | 102             | 1.52             | 70              | 13.8   | 37.1 | 103             | 1.52             | 67              | 13.5   |  |  |  |  |
| Dust Plumes                  | 37.9  | 90              | 1.62             | 75              | 13.8   | 164.6 | 145             | 1.39             | 67              | 11.9   | 80.5 | 92              | 1.59             | 47              | 11.8   | 9.1  | 91              | 1.61             | 67              | 13.2   |  |  |  |  |

<sup>A</sup>Insufficient data for statistics; values are assumed.

45

50 Table S6. Lognormal parameters geometric standard deviation  $\sigma_g$ , number geometric mean diameter  $D_{g,n}$ , and volume geometric mean diameter  $D_{g,v}$  for aerosol types from the OPAC database (Hess et al., 1998), from global shipborne data (Quinn et al., 2017), from the 7-mode modal aerosol model (MAM7; Liu et al., 2012), and from the ATom measurements. Atom values encompass the 25th to 75th percentiles; FT data are between 2 and 12 km. Quinn et al. data represent the full range. MAM7 ranges show the 10th and 90th percentiles. A subset of these data is shown in Fig. 15.

| Component                                    | $\sigma_g$ | $D_{g,n}$ ( $\mu m$ ) | $D_{g,v}$ ( $\mu m$ ) |
|----------------------------------------------|------------|-----------------------|-----------------------|
| OPAC water-soluble                           | 2.24       | 0.042                 | 0.30                  |
| ATom N. Pac. FT accumulation mode            | 1.44-2.09  | 0.08-0.11             | 0.18-0.30             |
| ATom BB accumulation mode                    | 1.54-1.78  | 0.08-0.13             | 0.20-0.25             |
| MAM7 accumulation mode                       | 1.8        | 0.056-0.26            | —                     |
| ATom N. Pac. FT Aitken mode                  | 1.55-2.12  | 0.029-0.052           | 0.068-0.20            |
| ATom MBL Aitken mode                         | 1.57-1.89  | 0.029-0.047           | 0.065-0.14            |
| Quinn et al. MBL Aitken mode                 | 1.3-1.8    | 0.01-0.08             | —                     |
| MAM7 Aitken mode                             | 1.6        | 0.015-0.052           | —                     |
| OPAC soot                                    | 2.00       | 0.022                 | 0.10                  |
| ATom free troposphere BC <sup>1</sup>        | 1.49-1.82  | 0.14-0.21             | 0.071 <sup>2</sup>    |
| ATom biomass burning BC <sup>1</sup>         | 1.41-1.52  | 0.17-0.20             | 0.074 <sup>2</sup>    |
| MAM7 primary carbon                          | 1.6        | 0.039-0.13            | —                     |
| OPAC sea-salt accumulation mode <sup>3</sup> | 2.03       | 0.42                  | 1.9                   |
| ATom MBL accumulation mode <sup>3</sup>      | 1.32-1.53  | 0.13-0.18             | 0.21-0.25             |
| Quinn et al. MBL accumulation mode           | 1.3-1.8    | 0.09-0.23             | —                     |
| MAM7 fine sea-salt mode                      | 2.0        | 0.095-0.56            | —                     |
| OPAC sea-salt coarse mode                    | 2.03       | 3.50                  | 15.8                  |
| ATom MBL coarse mode                         | 2.09-3.13  | 0.27-0.97             | 2.9-5.1               |
| Quinn et al. MBL sea spray mode              | 2.2-2.8    | 0.17-0.45             | —                     |
| MAM7 coarse sea-salt mode                    | 2.0        | 0.63-3.7              | —                     |
| OPAC mineral accumulation mode <sup>4</sup>  | 2.00       | 0.78                  | 3.20                  |
| ATom dust accumulation mode <sup>4</sup>     | 1.63-2.04  | 0.07-0.14             | 0.24-0.40             |
| MAM7 fine dust mode                          | 1.8        | 0.14-0.62             | —                     |
| OPAC mineral coarse mode                     | 2.15       | 3.80                  | 22.0                  |

|                                            |           |           |         |
|--------------------------------------------|-----------|-----------|---------|
| OPAC mineral-transported mode <sup>5</sup> | 2.20      | 1.00      | 6.00    |
| ATom dust coarse mode                      | 1.77-2.01 | 0.88-1.09 | 2.7-4.1 |
| MAM7 coarse dust mode                      | 1.8       | 0.59-2.75 | —       |

---

<sup>1</sup>Parameters for mass-equivalent sphere of uncoated BC

55 <sup>2</sup>Mean thickness of coating on BC

<sup>3</sup>A separate accumulation mode of sea-salt particles is not observed in the ATom dataset, but coarse-mode sea-salt particles extend into the accumulation mode. ATom modal parameters in the table are for the observed sulfate/organic-dominated accumulation mode.

60 <sup>4</sup>A separate accumulation mode of mineral particles is not observed in the ATom dataset. ATom modal parameters in the table are for the observed sulfate/organic-dominated accumulation mode.

<sup>5</sup>As described in Hess et al. (1998), "mineral-transported" refers to "desert dust that is transported over long distances with a reduced amount of large particles."

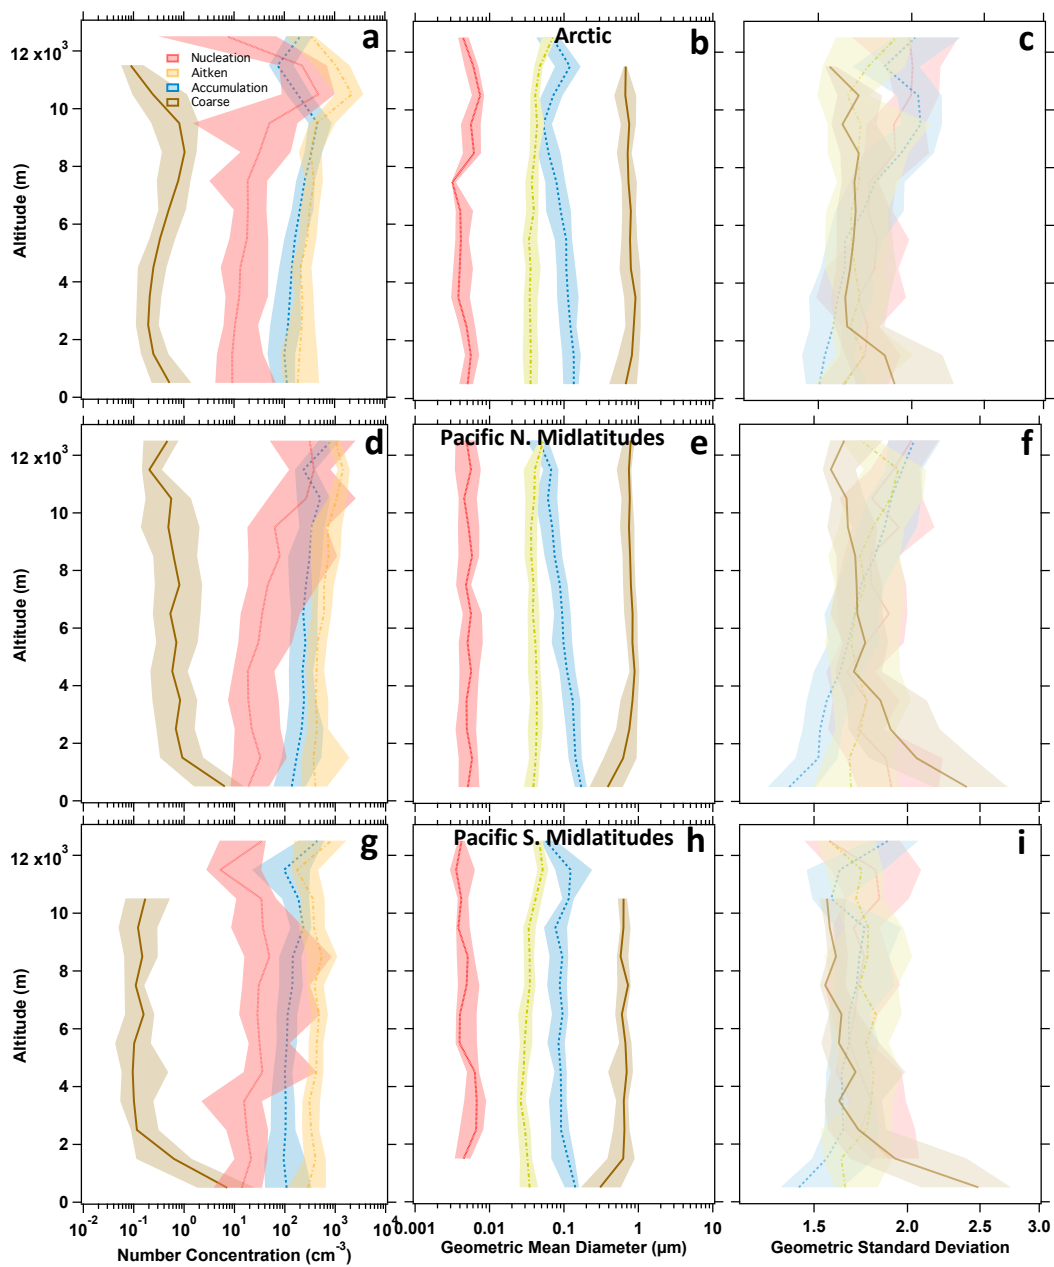

65 **Figure S1.** Vertical profiles of fitted lognormal parameters for the nucleation, Aitken, accumulation and coarse modes for the Arctic (a, b, and c), Pacific northern midlatitudes (d, e, and f), and the Pacific southern midlatitudes (g, h, and i) for the entire ATom project. Lines are median values and shaded regions show the interquartile range. Similar vertical profiles for the tropics of the Pacific and Atlantic are in Fig. 11 of the main text.

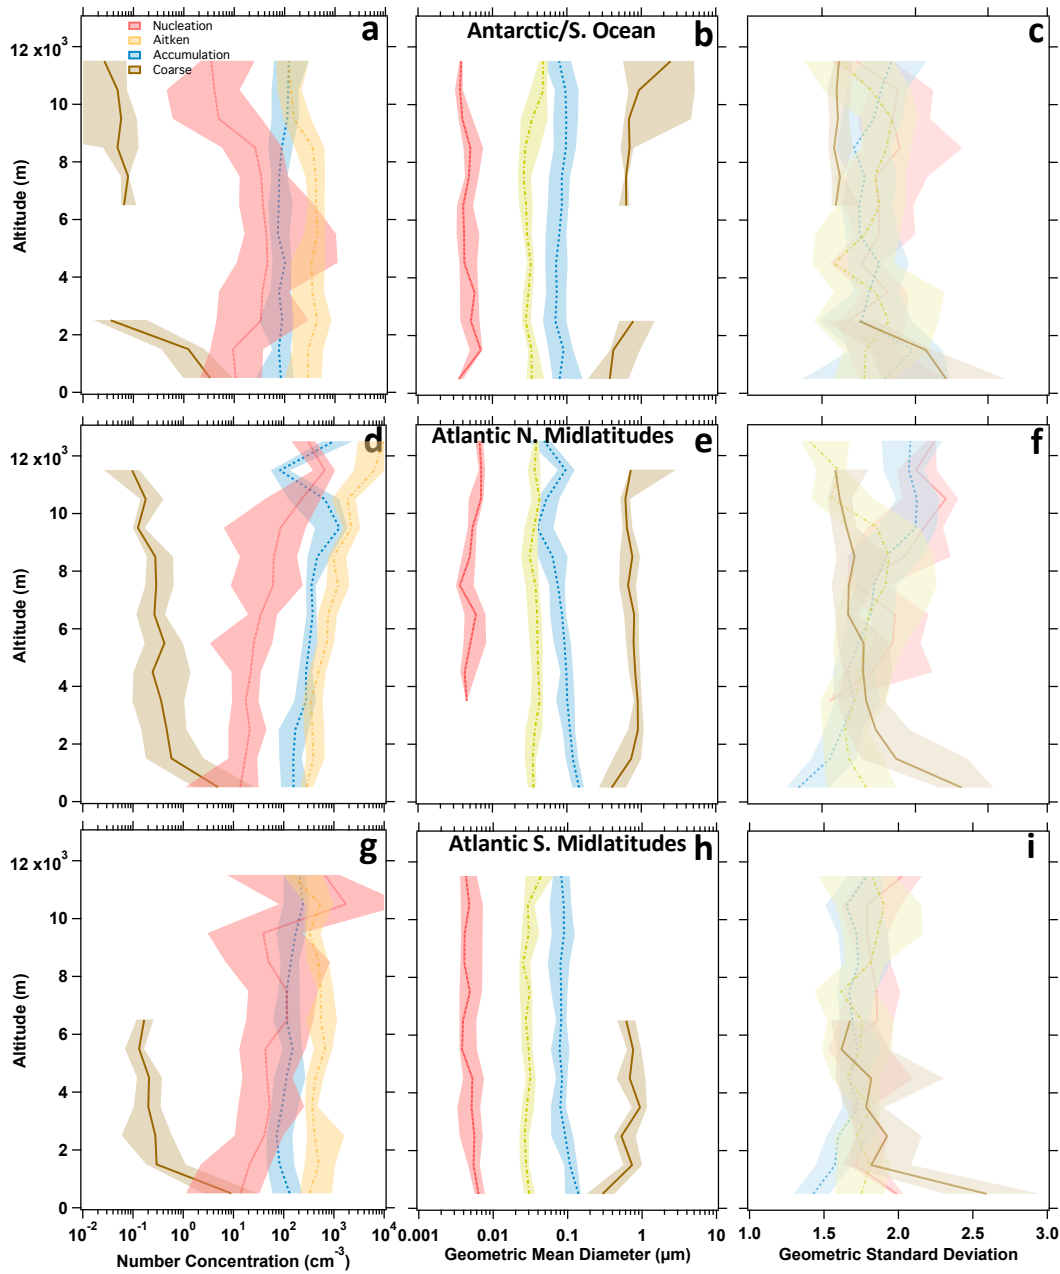

70

**Figure S2.** Vertical profiles of fitted lognormal parameters for the nucleation, Aitken, accumulation and coarse modes for the Antarctic and Southern Ocean (a, b, and c), Atlantic northern midlatitudes (d, e, and f), and the Atlantic southern midlatitudes (g, h, and i) for the entire ATom project. Lines are median values and shaded regions show the interquartile range. Similar vertical profiles for the tropics of the Pacific and Atlantic are in Fig. 12 of the main text.



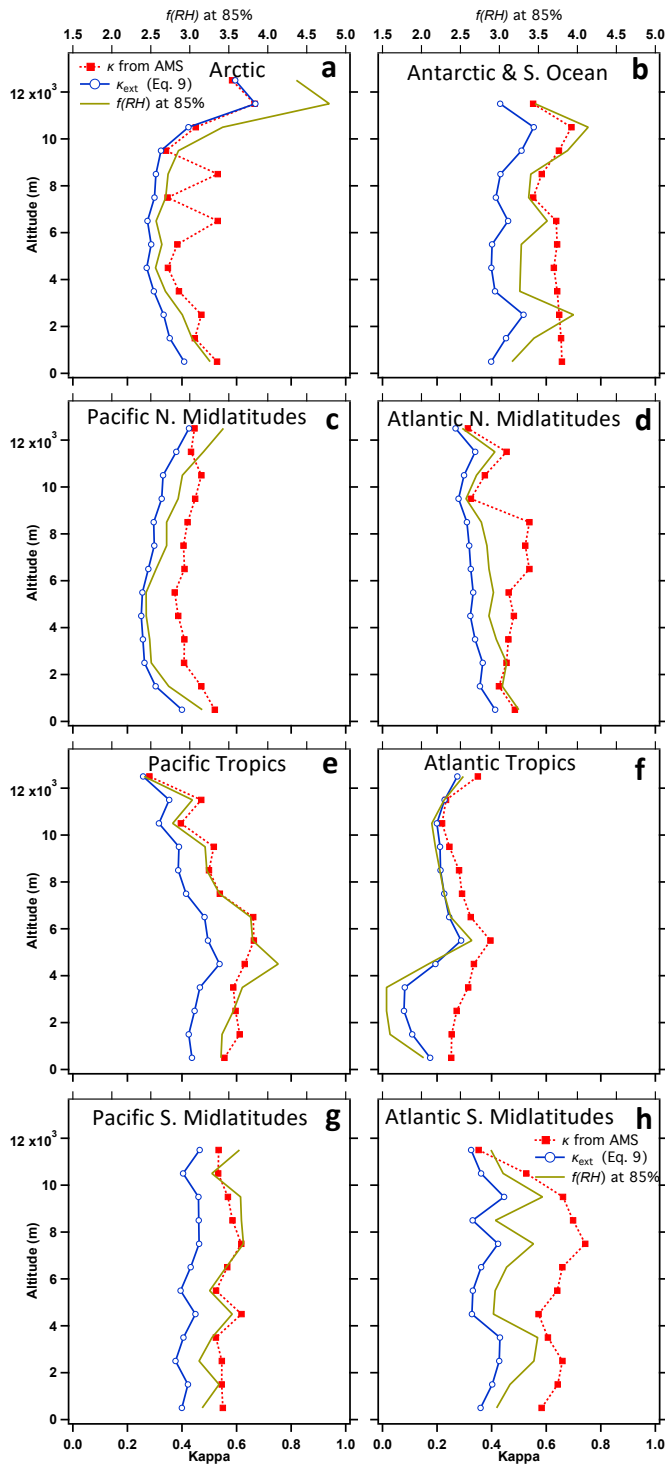

Figure S3. Median vertical profiles of  $\kappa$  determined from the AMS composition as described in Sect. 2.5 (bottom axis), of optical  $\kappa_{ext}$  values from Eq. 9 (bottom axis) and of  $f(RH)$  as described in Sect. 2.7.2 (top axis) for different regions sampled during the entire ATom project. a) Arctic. b) Antarctic and Southern Ocean. c) Pacific northern midlatitudes. d) Atlantic northern midlatitudes. e) Pacific tropics. f) Atlantic tropics. g) Pacific southern midlatitudes. h) Atlantic southern midlatitudes

## References

- 90 Heintzenberg, J. Properties of the log-normal particle size distribution, *Aerosol Sci. Technol.*, 21, 46-48, <https://doi.org/10.1080/02786829408959695>, 1994.
